# Supplementary material
Source: publisher figshare collection journal article supplement (https://gsajournals.figshare.com/ndownloader/files/16832483)
Supplement: Supplementary file 1 [file 16832483]

**TABLE S1.** SUMMARY OF ADDITIONAL MODELS TESTED FOR EACH SCENARIO OF GENETIC ARCHITECTURE OF THE TRAIT.

| Scenariosb  Modelsa | Sc0 | Sc1 | Sc2 | Sc3 |
| --- | --- | --- | --- | --- |
| **W10-2var** | **-** | **+** | **+** | **-** |
| **W20-2var** | **-** | **+** | **+** | **-** |
| **W40-2var** | **-** | **+** | **+** | **-** |
| **Dis** | **-** | **-** | **-** | **+** |
| **W10-Dis** | **-** | **-** | **-** | **+** |
| **W20-Dis** | **-** | **-** | **-** | **+** |
| **W40-Dis** | **-** | **-** | **-** | **+** |

aW10-2var= categorical model with window of 10 SNPs and extended linear predictor, W20-2var= categorical model with window of 20 SNPS and extended linear predictor, W40-2var= categorical model with window of 40 SNPS and extended linear predictor, Dis= continuous model with relative distance of SNPs from the edge of the chromosome, W10-Dis= combined model with window of 10 SNPs and distance values, W20-Dis= combined model with window of 20 SNPs and distance values, W40-Dis= combined model with window of 40 SNPs and distance values.

bSc0= simulation scenario 0, Sc1= simulation scenario 1, Sc2= simulation scenario 2, Sc3= simulation scenario 3
